# Supplementary material for: Down-Regulation of miRNA-708 Promotes Aberrant Calcium Signaling by Targeting Neuronatin in a Mouse Model of Angelman Syndrome
Source: Front Mol Neurosci. 2019 Feb 13;12:35. doi: 10.3389/fnmol.2019.00035 (PMC6381399; doi:10.3389/fnmol.2019.00035)
Supplement: Supplementary file 2 [file Table_1.XLSX]

## Sheet: Fold change 1.5
List of up and down-regulated miRNAs
Probe Set ID	FC ([Test] vs [Control])	Log FC ([Test] vs [Control])	FC (abs) ([Test] vs [Control])	Regulation ([Test] vs [Control])	Mirbase ID	Transcript ID(Array Design)	Species Scientific Name	Sequence Length	Sequence	Transcript Chromosome	Transcript URL	Mirbase Comment	Mirbase Description	Mirbase Family ID	Mirbase Family Accession	[Control](raw)	[Test](raw)	[Control](normalized)	[Test](normalized)
mmu-miR-490-3p_st	3.15214	1.65633	3.15214	up	mmu-mir-490	MI0005002	Mus musculus	22	CAACCUGGAGGACUCCAUGCUG	6	http://www.mirbase.org/cgi-bin/mirna_entry.pl?acc=MI0005002	---	Mus musculus miR-490 stem-loop	mir-490	MIPF0000229	33.0158	108.351	-0.700802	0.955531
mmu-miR-706_st	2.68247	1.42356	2.68247	up	mmu-mir-706	MI0004690	Mus musculus	22	AGAGAAACCCUGUCUCAAAAAA	6	http://www.mirbase.org/cgi-bin/mirna_entry.pl?acc=MI0004690	---	Mus musculus miR-706 stem-loop	---	---	28.8699	78.635	-0.649145	0.774416
mmu-miR-214_st	2.47376	1.30671	2.47376	up	mmu-mir-214	MI0000698	Mus musculus	22	ACAGCAGGCACAGACAGGCAGU	1	http://www.mirbase.org/cgi-bin/mirna_entry.pl?acc=MI0000698	Mouse mir-214 is predicted [2] based on homology to a reported miR from human (MIR:MI0000290) [1]. Its expression was later verified by cloning [3].	Mus musculus miR-214 stem-loop	mir-214	MIPF0000062	35.8377	91.7553	-0.552405	0.754302
mmu-miR-423-5p_st	2.4366	1.28487	2.4366	up	mmu-mir-423	MI0004637	Mus musculus	23	UGAGGGGCAGAGAGCGAGACUUU	11	http://www.mirbase.org/cgi-bin/mirna_entry.pl?acc=MI0004637	The mature sequence shown here represents the most commonly cloned form from large-scale cloning studies [2].	Mus musculus miR-423 stem-loop	mir-423	MIPF0000329	67.9477	166.668	-0.584827	0.700044
mmu-miR-320_st	2.34578	1.23007	2.34578	up	mmu-mir-320	MI0000704	Mus musculus	22	AAAAGCUGGGUUGAGAGGGCGA	14	http://www.mirbase.org/cgi-bin/mirna_entry.pl?acc=MI0000704	Mouse mir-320 is predicted [2] based on homology to a cloned miR from human (MIR:MI0000542) [1]. Its expression was later verified in mouse [3]. The mature sequence shown here represents the most commonly cloned form from large-scale cloning studies [4].	Mus musculus miR-320 stem-loop	mir-320	MIPF0000163	1315.72	3093.76	-0.582137	0.647929
mmu-miR-665_st	2.32809	1.21915	2.32809	up	mmu-mir-665	MI0004171	Mus musculus	20	ACCAGGAGGCUGAGGUCCCU	12	http://www.mirbase.org/cgi-bin/mirna_entry.pl?acc=MI0004171	The mature sequence shown here represents the most commonly cloned form from large-scale cloning studies [3].	Mus musculus mir-665 stem-loop	mir-665	MIPF0000404	443.518	1082.55	-0.417558	0.80159
mmu-miR-370_st	2.23906	1.16289	2.23906	up	mmu-mir-370	MI0001165	Mus musculus	22	GCCUGCUGGGGUGGAACCUGGU	12	http://www.mirbase.org/cgi-bin/mirna_entry.pl?acc=MI0001165	Seitz et al. predicted a cluster of 40 miRNAs in the imprinted human 14q32 domain, and confirmed the expression of a subset by Northern blot or primer extension in mouse [1]. The mature sequence shown here represents the most commonly cloned form from large-scale cloning studies [3].	Mus musculus miR-370 stem-loop	mir-370	MIPF0000167	417.676	947.236	-0.50438	0.65851
mmu-miR-700_st	2.20364	1.13989	2.20364	up	mmu-mir-700	MI0004684	Mus musculus	21	CACGCGGGAACCGAGUCCACC	4	http://www.mirbase.org/cgi-bin/mirna_entry.pl?acc=MI0004684	---	Mus musculus miR-700 stem-loop	---	---	220.957	497.556	-0.44537	0.694517
mmu-miR-760-3p_st	2.19165	1.13202	2.19165	up	mmu-mir-760	MI0004605	Mus musculus	20	CGGCUCUGGGUCUGUGGGGA	3	http://www.mirbase.org/cgi-bin/mirna_entry.pl?acc=MI0004605	The mature sequence shown here represents the most commonly cloned form from large-scale cloning studies [2]. The 5' end of the miRNA may be offset with respect to previous annotations.	Mus musculus miR-760 stem-loop	mir-760	MIPF0000395	156.592	346.924	-0.485645	0.646372
mmu-miR-770-3p_st	2.19024	1.13109	2.19024	up	mmu-mir-770	MI0004203	Mus musculus	22	CGUGGGCCUGACGUGGAGCUGG	12	http://www.mirbase.org/cgi-bin/mirna_entry.pl?acc=MI0004203	---	Mus musculus miR-770 stem-loop	mir-770	MIPF0000355	445.018	998.422	-0.434073	0.697019
mmu-miR-210_st	2.16899	1.11703	2.16899	up	mmu-mir-210	MI0000695	Mus musculus	22	CUGUGCGUGUGACAGCGGCUGA	7	http://www.mirbase.org/cgi-bin/mirna_entry.pl?acc=MI0000695	Mouse mir-210 is predicted [3] based on homology to a reported miR from human (MIR:MI0000286) [1]. Its expression in mouse was later verified independently [2,4].	Mus musculus miR-210 stem-loop	mir-210	MIPF0000086	257.756	577.128	-0.429462	0.687563
mmu-miR-490-5p_st	2.16163	1.11212	2.16163	up	mmu-mir-490	MI0005002	Mus musculus	20	CCAUGGAUCUCCAGGUGGGU	6	http://www.mirbase.org/cgi-bin/mirna_entry.pl?acc=MI0005002	---	Mus musculus miR-490 stem-loop	mir-490	MIPF0000229	87.122	190.38	-0.480344	0.631777
mmu-miR-668_st	2.15928	1.11055	2.15928	up	mmu-mir-668	MI0004134	Mus musculus	24	UGUCACUCGGCUCGGCCCACUACC	12	http://www.mirbase.org/cgi-bin/mirna_entry.pl?acc=MI0004134	---	Mus musculus mir-668 stem-loop	mir-668	MIPF0000357	370.516	809.236	-0.472767	0.637782
mmu-miR-500_st	2.08597	1.06072	2.08597	up	mmu-mir-500	MI0004702	Mus musculus	22	AAUGCACCUGGGCAAGGGUUCA	X	http://www.mirbase.org/cgi-bin/mirna_entry.pl?acc=MI0004702	Mouse miR-500 was identified independently by two groups. Wheeler et al cloned a mature product with the same length as the human ortholog (MIR:MI0003184) [1]. Mineno et al report a shorter mature product with 1 additional base at the 5' end and 3 fewer at the 3' end (AAUGCACCUGGGCAAGGGUU), referred to as miR-500b in [2]. The mature sequence shown here represents the most commonly cloned form fro…	Mus musculus miR-500 stem-loop	mir-500	MIPF0000139	467.443	1009.44	-0.349606	0.711111
mmu-miR-341_st	2.06866	1.0487	2.06866	up	mmu-mir-341	MI0000625	Mus musculus	21	UCGGUCGAUCGGUCGGUCGGU	12	http://www.mirbase.org/cgi-bin/mirna_entry.pl?acc=MI0000625	Kim et al. cloned 40 new miRNAs from rat E18 primary cortical neurons [1]. This mouse miRNA is predicted based on homology to the verified rat sequence (MIR:MI0000624) - its expression was later verified in mouse [2]. The mature sequence shown here represents the most commonly cloned form from large-scale cloning studies [2]. The 5' end of the miRNA may be offset with respect to previous annotati…	Mus musculus miR-341 stem-loop	mir-341	MIPF0000269	74.2486	154.749	-0.496143	0.552557
mmu-miR-540-3p_st	2.05435	1.03868	2.05435	up	mmu-mir-540	MI0003518	Mus musculus	20	AGGUCAGAGGUCGAUCCUGG	12	http://www.mirbase.org/cgi-bin/mirna_entry.pl?acc=MI0003518	---	Mus musculus miR-540 stem-loop	mir-540	MIPF0000212	210.151	436.751	-0.433126	0.605557
mmu-miR-139-3p_st	2.04222	1.03014	2.04222	up	mmu-mir-139	MI0000693	Mus musculus	22	UGGAGACGCGGCCCUGUUGGAG	7	http://www.mirbase.org/cgi-bin/mirna_entry.pl?acc=MI0000693	The mature sequence shown here represents the most commonly cloned form from large-scale cloning studies [2].	Mus musculus miR-139 stem-loop	mir-139	MIPF0000117	552.546	1140.41	-0.412968	0.617167
mmu-miR-874_st	1.98476	0.988963	1.98476	up	mmu-mir-874	MI0005479	Mus musculus	22	CUGCCCUGGCCCGAGGGACCGA	13	http://www.mirbase.org/cgi-bin/mirna_entry.pl?acc=MI0005479	---	Mus musculus miR-874 stem-loop	mir-874	MIPF0000401	350.191	712.045	-0.395837	0.593125
mmu-miR-667_st	1.96732	0.976231	1.96732	up	mmu-mir-667	MI0004196	Mus musculus	23	UGACACCUGCCACCCAGCCCAAG	12	http://www.mirbase.org/cgi-bin/mirna_entry.pl?acc=MI0004196	---	Mus musculus mir-667 stem-loop	mir-667	MIPF0000794	243.541	497.441	-0.324086	0.652145
mmu-miR-877_st	1.96474	0.974338	1.96474	up	mmu-mir-877	MI0005553	Mus musculus	20	GUAGAGGAGAUGGCGCAGGG	17	http://www.mirbase.org/cgi-bin/mirna_entry.pl?acc=MI0005553	This sequence was identified as a miRNA candidate by Berezikov et al. using RAKE and MPSS techniques [1]. Expression was later confirmed by cloning [2].	Mus musculus miR-877 stem-loop	mir-877	MIPF0000392	42.8982	86.8532	-0.344932	0.629406
mmu-miR-574-3p_st	1.95616	0.968022	1.95616	up	mmu-mir-574	MI0005518	Mus musculus	22	CACGCUCAUGCACACACCCACA	5	http://www.mirbase.org/cgi-bin/mirna_entry.pl?acc=MI0005518	---	Mus musculus miR-574 stem-loop	mir-574	MIPF0000419	277.835	552.082	-0.403188	0.564833
mmu-miR-298_st	1.93555	0.952745	1.93555	up	mmu-mir-298	MI0000398	Mus musculus	23	GGCAGAGGAGGGCUGUUCUUCCC	2	http://www.mirbase.org/cgi-bin/mirna_entry.pl?acc=MI0000398	The mature sequence shown here represents the most commonly cloned form from large-scale cloning studies [2].	Mus musculus miR-298 stem-loop	mir-298	MIPF0000206	298.236	581.753	-0.417914	0.534831
mmu-miR-92b_st	1.93121	0.949505	1.93121	up	mmu-mir-92b	MI0005521	Mus musculus	22	UAUUGCACUCGUCCCGGCCUCC	3	http://www.mirbase.org/cgi-bin/mirna_entry.pl?acc=MI0005521	---	Mus musculus miR-92b stem-loop	mir-25	MIPF0000013	610.273	1193.73	-0.384459	0.565047
mmu-miR-134_st	1.92801	0.947113	1.92801	up	mmu-mir-134	MI0000160	Mus musculus	22	UGUGACUGGUUGACCAGAGGGG	12	http://www.mirbase.org/cgi-bin/mirna_entry.pl?acc=MI0000160	---	Mus musculus miR-134 stem-loop	mir-134	MIPF0000112	485.61	948.077	-0.393365	0.553748
mmu-miR-346_st	1.91692	0.938792	1.91692	up	mmu-mir-346	MI0000634	Mus musculus	23	UGUCUGCCCGAGUGCCUGCCUCU	14	http://www.mirbase.org/cgi-bin/mirna_entry.pl?acc=MI0000634	Kim et al. cloned 40 new miRNAs from rat E18 primary cortical neurons [1]. This mouse miRNA is predicted based on homology to the verified rat sequence (MIR:MI0000633) - its expression has not been verified in mouse. The sequence reported in [1] contains two 3' terminal A residues, which conflict with the precursor sequence shown here.	Mus musculus miR-346 stem-loop	mir-346	MIPF0000188	1010.19	2015.04	-0.270494	0.668297
mmu-miR-491_st	1.8824	0.912575	1.8824	up	mmu-mir-491	MI0004680	Mus musculus	22	AGUGGGGAACCCUUCCAUGAGG	4	http://www.mirbase.org/cgi-bin/mirna_entry.pl?acc=MI0004680	---	Mus musculus miR-491 stem-loop	mir-491	MIPF0000319	366.795	703.375	-0.36439	0.548184
mmu-miR-532-5p_st	1.86895	0.90223	1.86895	up	mmu-mir-532	MI0003206	Mus musculus	22	CAUGCCUUGAGUGUAGGACCGU	X	http://www.mirbase.org/cgi-bin/mirna_entry.pl?acc=MI0003206	---	Mus musculus miR-532 stem-loop	mir-188	MIPF0000113	754.635	1435.46	-0.331696	0.570534
mmu-miR-184_st	1.86297	0.897608	1.86297	up	mmu-mir-184	MI0000226	Mus musculus	22	UGGACGGAGAACUGAUAAGGGU	9	http://www.mirbase.org/cgi-bin/mirna_entry.pl?acc=MI0000226	---	Mus musculus miR-184 stem-loop	mir-184	MIPF0000059	94.7686	179.514	-0.368044	0.529564
mmu-miR-339-5p_st	1.8456	0.884086	1.8456	up	mmu-mir-339	MI0000621	Mus musculus	23	UCCCUGUCCUCCAGGAGCUCACG	5	http://www.mirbase.org/cgi-bin/mirna_entry.pl?acc=MI0000621	The mature sequence shown here represents the most commonly cloned form from large-scale cloning studies [1].	Mus musculus miR-339 stem-loop	mir-339	MIPF0000193	177.28	331.659	-0.362231	0.521855
mmu-miR-486_st	1.84488	0.883526	1.84488	up	mmu-mir-486	MI0003493	Mus musculus	22	UCCUGUACUGAGCUGCCCCGAG	8	http://www.mirbase.org/cgi-bin/mirna_entry.pl?acc=MI0003493	---	Mus musculus miR-486 stem-loop	mir-486	MIPF0000220	426.248	808.835	-0.300191	0.583335
mmu-miR-501-3p_st	1.83159	0.873093	1.83159	up	mmu-mir-501	MI0004703	Mus musculus	22	AAUGCACCCGGGCAAGGAUUUG	X	http://www.mirbase.org/cgi-bin/mirna_entry.pl?acc=MI0004703	---	Mus musculus miR-501 stem-loop	mir-500	MIPF0000139	87.4045	160.218	-0.43318	0.439913
mmu-miR-505-5p_st	1.82981	0.871697	1.82981	up	mmu-mir-505	MI0004706	Mus musculus	23	GGGAGCCAGGAAGUAUUGAUGUU	X	http://www.mirbase.org/cgi-bin/mirna_entry.pl?acc=MI0004706	---	Mus musculus miR-505 stem-loop	mir-505	MIPF0000217	169.956	315.701	-0.325841	0.545856
mmu-miR-1187_st	1.77303	0.82622	1.77303	up	mmu-mir-1187	MI0006285	Mus musculus	23	UAUGUGUGUGUGUAUGUGUGUAA	5	http://www.mirbase.org/cgi-bin/mirna_entry.pl?acc=MI0006285	---	Mus musculus miR-1187 stem-loop	---	---	74.7284	132.807	-0.40067	0.42555
mmu-miR-485_st	1.77289	0.826099	1.77289	up	mmu-mir-485	MI0003492	Mus musculus	22	AGAGGCUGGCCGUGAUGAAUUC	12	http://www.mirbase.org/cgi-bin/mirna_entry.pl?acc=MI0003492	miR-485-3p was predicted by Sewer et al [1], and its expression later verified experimentally by Mineno et al using MPSS technology [2]. The MPSS protocol used provides 22nt sequences, but the true extents of the mature miRNA are not reliably obtained. Landgraf et al. show that the 5' product is the predominant one [3].	Mus musculus miR-485 stem-loop	mir-485	MIPF0000201	852.81	1536.65	-0.289386	0.536713
mmu-miR-433_st	1.76629	0.82072	1.76629	up	mmu-mir-433	MI0001525	Mus musculus	22	AUCAUGAUGGGCUCCUCGGUGU	12	http://www.mirbase.org/cgi-bin/mirna_entry.pl?acc=MI0001525	Landgraf et al. show that the 3' product is the predominant one [2]. The 5' product is renames miR-433* here.	Mus musculus miR-433 stem-loop	mir-433	MIPF0000177	2794.22	4958.39	-0.362386	0.458334
mmu-miR-351_st	1.72697	0.788241	1.72697	up	mmu-mir-351	MI0000643	Mus musculus	24	UCCCUGAGGAGCCCUUUGAGCCUG	X	http://www.mirbase.org/cgi-bin/mirna_entry.pl?acc=MI0000643	The predominant miRNA cloned by Langraf et al. has a 3' terminal U residue, which is incompatible with the genome sequence [1].	Mus musculus miR-351 stem-loop	mir-351	MIPF0000244	215.179	380.122	-0.258835	0.529407
mmu-miR-5133_st	1.72492	0.786532	1.72492	up	mmu-mir-5133	MI0018045	Mus musculus	21	GCUGGAGCUGCGGCAGCGCAG	9	http://www.mirbase.org/cgi-bin/mirna_entry.pl?acc=MI0018045	---	Mus musculus miR-5133 stem-loop	---	---	1.94702	3.45964	-0.231978	0.554554
mmu-miR-423-3p_st	1.69999	0.765528	1.69999	up	mmu-mir-423	MI0004637	Mus musculus	23	AGCUCGGUCUGAGGCCCCUCAGU	11	http://www.mirbase.org/cgi-bin/mirna_entry.pl?acc=MI0004637	The mature sequence shown here represents the most commonly cloned form from large-scale cloning studies [2].	Mus musculus miR-423 stem-loop	mir-423	MIPF0000329	159.662	272.911	-0.308265	0.457263
mmu-miR-99b_st	1.68617	0.753754	1.68617	up	mmu-mir-99b	MI0000147	Mus musculus	22	CACCCGUAGAACCGACCUUGCG	17	http://www.mirbase.org/cgi-bin/mirna_entry.pl?acc=MI0000147	Expression of this miRNA in mouse was independently verified in the brain [1], embryonic stem cells [2] and testes [3].	Mus musculus miR-99b stem-loop	mir-99	MIPF0000025	4769.29	8206.23	-0.246968	0.506785
mmu-miR-672_st	1.66822	0.738311	1.66822	up	mmu-mir-672	MI0004258	Mus musculus	23	UGAGGUUGGUGUACUGUGUGUGA	X	http://www.mirbase.org/cgi-bin/mirna_entry.pl?acc=MI0004258	The mature sequence shown here represents the most commonly cloned form from large-scale cloning studies [3].	Mus musculus mir-672 stem-loop	mir-672	MIPF0000391	678.453	1136.59	-0.337491	0.40082
mmu-miR-666-5p_st	1.65923	0.73051	1.65923	up	mmu-mir-666	MI0004553	Mus musculus	22	AGCGGGCACAGCUGUGAGAGCC	12	http://www.mirbase.org/cgi-bin/mirna_entry.pl?acc=MI0004553	---	Mus musculus mir-666 stem-loop	mir-666	MIPF0000782	180.082	305.552	-0.24068	0.48983
mmu-miR-455_st	1.65233	0.724504	1.65233	up	mmu-mir-455	MI0004679	Mus musculus	21	GCAGUCCACGGGCAUAUACAC	4	http://www.mirbase.org/cgi-bin/mirna_entry.pl?acc=MI0004679	Landgraf et al. show that the 3' mature miRNA product is the predominant one [3]. The 5' miRNA is renamed miR-455* here. The mature sequence shown here represents the most commonly cloned form from large-scale cloning studies [3]. The 5' end of the miRNA may be offset with respect to previous annotations.	Mus musculus miR-455 stem-loop	mir-455	MIPF0000129	305.274	505.954	-0.317861	0.406644
mmu-miR-1196_st	1.65213	0.724327	1.65213	up	mmu-mir-1196	MI0006304	Mus musculus	20	AAAUCUACCUGCCUCUGCCU	14	http://www.mirbase.org/cgi-bin/mirna_entry.pl?acc=MI0006304	---	Mus musculus miR-1196 stem-loop	---	---	427.654	707.284	-0.34365	0.380676
mmu-miR-93_st	1.64412	0.717316	1.64412	up	mmu-mir-93	MI0000581	Mus musculus	23	CAAAGUGCUGUUCGUGCAGGUAG	5	http://www.mirbase.org/cgi-bin/mirna_entry.pl?acc=MI0000581	---	Mus musculus miR-93 stem-loop	mir-17	MIPF0000001	1645.17	2738.87	-0.250916	0.466401
mmu-miR-130b_st	1.6423	0.715717	1.6423	up	mmu-mir-130b	MI0000408	Mus musculus	22	CAGUGCAAUGAUGAAAGGGCAU	16	http://www.mirbase.org/cgi-bin/mirna_entry.pl?acc=MI0000408	---	Mus musculus miR-130b stem-loop	mir-130	MIPF0000034	201.645	335.57	-0.258137	0.45758
mmu-miR-296-3p_st	1.64139	0.71492	1.64139	up	mmu-mir-296	MI0000394	Mus musculus	22	GAGGGUUGGGUGGAGGCUCUCC	2	http://www.mirbase.org/cgi-bin/mirna_entry.pl?acc=MI0000394	---	Mus musculus miR-296 stem-loop	mir-296	MIPF0000159	93.5993	154.479	-0.293196	0.421725
mmu-miR-342-5p_st	1.60165	0.679563	1.60165	up	mmu-mir-342	MI0000627	Mus musculus	22	AGGGGUGCUAUCUGUGAUUGAG	12	http://www.mirbase.org/cgi-bin/mirna_entry.pl?acc=MI0000627	Kim et al. cloned 40 new miRNAs from rat E18 primary cortical neurons [1]. This mouse miRNA is predicted based on homology to the verified rat sequence (MIR:MI0000626). Seitz et al. independently predicted the miRNA hairpin precursor sequence by conservation between mouse and human [2]. Landgraf et al. later cloned and sequenced mature products from both arms of the predicted hairpin [3]. The mat…	Mus musculus miR-342 stem-loop	mir-342	MIPF0000190	534.559	856.491	-0.331042	0.348521
mmu-miR-431_st	1.58926	0.668357	1.58926	up	mmu-mir-431	MI0001524	Mus musculus	21	UGUCUUGCAGGCCGUCAUGCA	12	http://www.mirbase.org/cgi-bin/mirna_entry.pl?acc=MI0001524	The mature sequence shown here represents the most commonly cloned form from large-scale cloning studies [3].	Mus musculus miR-431 stem-loop	mir-431	MIPF0000142	401.425	638.016	-0.332833	0.335525
mmu-miR-193b_st	1.58374	0.663334	1.58374	up	mmu-mir-193b	MI0005484	Mus musculus	22	AACUGGCCCACAAAGUCCCGCU	16	http://www.mirbase.org/cgi-bin/mirna_entry.pl?acc=MI0005484	---	Mus musculus miR-193b stem-loop	mir-193	MIPF0000082	1662.77	2668.84	-0.241049	0.422286
mmu-miR-149_st	1.56597	0.647058	1.56597	up	mmu-mir-149	MI0000171	Mus musculus	23	UCUGGCUCCGUGUCUUCACUCCC	1	http://www.mirbase.org/cgi-bin/mirna_entry.pl?acc=MI0000171	The mature sequence shown here represents the most commonly cloned form from large-scale cloning studies [2].	Mus musculus miR-149 stem-loop	mir-149	MIPF0000274	3480.07	5460.28	-0.284792	0.362266
mmu-miR-344_st	1.55098	0.63318	1.55098	up	mmu-mir-344-1 /// mmu-mir-344-2	MI0000630 /// MI0005495	Mus musculus	23	UGAUCUAGCCAAAGCCUGACUGU	7 /// 7	http://www.mirbase.org/cgi-bin/mirna_entry.pl?acc=MI0000630 /// http://www.mirbase.org/cgi-bin/mirna_entry.pl?acc=MI0005495	Kim et al. cloned 40 new miRNAs from rat E18 primary cortical neurons [1]. This mouse miRNA is predicted based on homology to the verified rat sequence (MIR:MI0000629) - its expression was later independently verified in mouse [2]. ///	Mus musculus miR-344-1 stem-loop /// Mus musculus miR-344-2 stem-loop	mir-344 /// mir-344	MIPF0000267 /// MIPF0000267	1895.27	2946.79	-0.290648	0.342532
mmu-miR-674_st	1.54612	0.628649	1.54612	up	mmu-mir-674	MI0004611	Mus musculus	22	GCACUGAGAUGGGAGUGGUGUA	2	http://www.mirbase.org/cgi-bin/mirna_entry.pl?acc=MI0004611	Landgraf et al. show that the 5' miRNA product is the predominant one [4].	Mus musculus mir-674 stem-loop	mir-674	MIPF0000394	3728.52	5809.41	-0.232639	0.39601
mmu-miR-383_st	1.5279	0.611547	1.5279	up	mmu-mir-383	MI0000800	Mus musculus	22	AGAUCAGAAGGUGACUGUGGCU	8	http://www.mirbase.org/cgi-bin/mirna_entry.pl?acc=MI0000800	---	Mus musculus miR-383 stem-loop	mir-383	MIPF0000137	3843.69	5926.34	-0.236691	0.374856
mmu-miR-342-3p_st	1.52099	0.605009	1.52099	up	mmu-mir-342	MI0000627	Mus musculus	23	UCUCACACAGAAAUCGCACCCGU	12	http://www.mirbase.org/cgi-bin/mirna_entry.pl?acc=MI0000627	Kim et al. cloned 40 new miRNAs from rat E18 primary cortical neurons [1]. This mouse miRNA is predicted based on homology to the verified rat sequence (MIR:MI0000626). Seitz et al. independently predicted the miRNA hairpin precursor sequence by conservation between mouse and human [2]. Landgraf et al. later cloned and sequenced mature products from both arms of the predicted hairpin [3]. The mat…	Mus musculus miR-342 stem-loop	mir-342	MIPF0000190	6402.31	9762	-0.257554	0.347455
mmu-miR-652_st	1.51624	0.600498	1.51624	up	mmu-mir-652	MI0004965	Mus musculus	21	AAUGGCGCCACUAGGGUUGUG	X	http://www.mirbase.org/cgi-bin/mirna_entry.pl?acc=MI0004965	The predominant miRNA cloned by Langraf et al. has a 3' terminal U residue, which is incompatible with the genome sequence [2].	Mus musculus miR-652 stem-loop	mir-652	MIPF0000333	2240.68	3429.45	-0.226271	0.374227
mmu-miR-669c_st	-1.50145	-0.586352	1.50145	down	mmu-mir-669c	MI0004673	Mus musculus	22	AUAGUUGUGUGUGGAUGUGUGU	2	http://www.mirbase.org/cgi-bin/mirna_entry.pl?acc=MI0004673	---	Mus musculus miR-669c stem-loop	mir-467	MIPF0000316	207.095	138.007	0.277239	-0.309113
mmu-let-7a_st	-1.50622	-0.590929	1.50622	down	mmu-let-7a-1 /// mmu-let-7a-2	MI0000556 /// MI0000557	Mus musculus	22	UGAGGUAGUAGGUUGUAUAGUU	13 /// 9	http://www.mirbase.org/cgi-bin/mirna_entry.pl?acc=MI0000556 /// http://www.mirbase.org/cgi-bin/mirna_entry.pl?acc=MI0000557	The mature sequence shown here represents the most commonly cloned form from large-scale cloning studies [4]. /// The mature sequence shown here represents the most commonly cloned form from large-scale cloning studies [4].	Mus musculus let-7a-1 stem-loop /// Mus musculus let-7a-2 stem-loop	let-7 /// let-7	MIPF0000002 /// MIPF0000002	18788.4	12491.9	0.26096	-0.329969
mmu-miR-153_st	-1.51206	-0.596516	1.51206	down	mmu-mir-153	MI0000175	Mus musculus	22	UUGCAUAGUCACAAAAGUGAUC	12	http://www.mirbase.org/cgi-bin/mirna_entry.pl?acc=MI0000175	---	Mus musculus miR-153 stem-loop	mir-153	MIPF0000050	826.177	551.208	0.221004	-0.375512
mmu-miR-30b_st	-1.53575	-0.618944	1.53575	down	mmu-mir-30b	MI0000145	Mus musculus	22	UGUAAACAUCCUACACUCAGCU	15	http://www.mirbase.org/cgi-bin/mirna_entry.pl?acc=MI0000145	---	Mus musculus miR-30b stem-loop	mir-30	MIPF0000005	3547.61	2312.97	0.285018	-0.333926
mmu-miR-669p_st	-1.54854	-0.630906	1.54854	down	mmu-mir-669p-1 /// mmu-mir-669p-2	MI0014064 /// MI0014071	Mus musculus	24	AGUUGUGUGUGCAUGUUCAUGUCU	2 /// 2	http://www.mirbase.org/cgi-bin/mirna_entry.pl?acc=MI0014064 /// http://www.mirbase.org/cgi-bin/mirna_entry.pl?acc=MI0014071	///	Mus musculus miR-669p-1 stem-loop /// Mus musculus miR-669p-2 stem-loop	mir-467 /// mir-467	MIPF0000316 /// MIPF0000316	73.6927	47.5794	0.324134	-0.306772
mmu-miR-106a_st	-1.54914	-0.631465	1.54914	down	mmu-mir-106a	MI0000406	Mus musculus	23	CAAAGUGCUAACAGUGCAGGUAG	X	http://www.mirbase.org/cgi-bin/mirna_entry.pl?acc=MI0000406	Mouse and human miR-106a (MIR:MI0000406 and MIR:MI0000113) differ at two positions but the precursor sequences are clearly closely related. The sequences are also related to mir-17 (MIR:MI0000071 and MIR:MI0000687). The mature sequence shown here represents the most commonly cloned form from large-scale cloning studies [2].	Mus musculus miR-106a stem-loop	mir-17	MIPF0000001	393.996	254.479	0.301272	-0.330193
mmu-miR-27b_st	-1.56315	-0.644453	1.56315	down	mmu-mir-27b	MI0000142	Mus musculus	21	UUCACAGUGGCUAAGUUCUGC	13	http://www.mirbase.org/cgi-bin/mirna_entry.pl?acc=MI0000142	---	Mus musculus miR-27b stem-loop	mir-27	MIPF0000036	4553.19	2929.97	0.24514	-0.399313
mmu-miR-137_st	-1.56948	-0.65029	1.56948	down	mmu-mir-137	MI0000163	Mus musculus	23	UUAUUGCUUAAGAAUACGCGUAG	3	http://www.mirbase.org/cgi-bin/mirna_entry.pl?acc=MI0000163	---	Mus musculus miR-137 stem-loop	mir-137	MIPF0000106	599.759	383.264	0.275663	-0.374627
mmu-miR-29b_st	-1.57919	-0.659181	1.57919	down	mmu-mir-29b-1 /// mmu-mir-29b-2	MI0000143 /// MI0000712	Mus musculus	23	UAGCACCAUUUGAAAUCAGUGUU	6 /// 1	http://www.mirbase.org/cgi-bin/mirna_entry.pl?acc=MI0000143 /// http://www.mirbase.org/cgi-bin/mirna_entry.pl?acc=MI0000712	///	Mus musculus miR-29b-1 stem-loop /// Mus musculus miR-29b-2 stem-loop	mir-29 /// mir-29	MIPF0000009 /// MIPF0000009	1173.7	743.262	0.328753	-0.330427
mmu-miR-598_st	-1.58269	-0.66238	1.58269	down	mmu-mir-598	MI0005556	Mus musculus	22	UACGUCAUCGUCGUCAUCGUUA	14	http://www.mirbase.org/cgi-bin/mirna_entry.pl?acc=MI0005556	This sequence was identified as a miRNA candidate by Berezikov et al. using RAKE and MPSS techniques [1]. Expression was independently shown in human and rat [2].	Mus musculus miR-598 stem-loop	mir-598	MIPF0000393	136.782	86.3283	0.352761	-0.30962
mmu-miR-301a_st	-1.58735	-0.66662	1.58735	down	mmu-mir-301a	MI0000401	Mus musculus	23	CAGUGCAAUAGUAUUGUCAAAGC	11	http://www.mirbase.org/cgi-bin/mirna_entry.pl?acc=MI0000401	---	Mus musculus miR-301a stem-loop	mir-130	MIPF0000034	201.826	128.053	0.278393	-0.388227
mmu-miR-25_st	-1.59066	-0.66963	1.59066	down	mmu-mir-25	MI0000689	Mus musculus	22	CAUUGCACUUGUCUCGGUCUGA	5	http://www.mirbase.org/cgi-bin/mirna_entry.pl?acc=MI0000689	Mouse mir-25 is predicted [3] based on homology to a cloned miR from human (MIR:MI0000082) [1]. Its expression has been later independently verified in mouse [2,4].	Mus musculus miR-25 stem-loop	mir-25	MIPF0000013	385.399	242.292	0.332952	-0.336678
mmu-miR-98_st	-1.60761	-0.684918	1.60761	down	mmu-mir-98	MI0000586	Mus musculus	22	UGAGGUAGUAAGUUGUAUUGUU	X	http://www.mirbase.org/cgi-bin/mirna_entry.pl?acc=MI0000586	---	Mus musculus miR-98 stem-loop	let-7	MIPF0000002	153.822	96.8553	0.258147	-0.426772
mmu-miR-9_st	-1.6081	-0.685358	1.6081	down	mmu-mir-9-1 /// mmu-mir-9-2 /// mmu-mir-9-3	MI0000720 /// MI0000157 /// MI0000721	Mus musculus	23	UCUUUGGUUAUCUAGCUGUAUGA	3 /// 13 /// 7	http://www.mirbase.org/cgi-bin/mirna_entry.pl?acc=MI0000720 /// http://www.mirbase.org/cgi-bin/mirna_entry.pl?acc=MI0000157 /// http://www.mirbase.org/cgi-bin/mirna_entry.pl?acc=MI0000721	Mouse miR-9 was cloned from mouse brain tissues in [1]. There are 3 predicted hairpin precursor structures in the mouse genome, each has a closely related human homologue [3]. Two copies of mir-9-1 (MIR:MI0000720) are found as part of a larger duplicated region on mouse chromosome 3, mir-9-2 (MIR:MI0000157, previously named mir-9 here) is found on chromosome 13, and mir-9-3 (MIR:MI0000721) on chr…	Mus musculus miR-9-1 stem-loop /// Mus musculus miR-9-2 stem-loop /// Mus musculus miR-9-3 stem-loop	mir-9 /// mir-9 /// mir-9	MIPF0000014 /// MIPF0000014 /// MIPF0000014	821.26	505.26	0.432971	-0.252387
mmu-miR-154_st	-1.63818	-0.712095	1.63818	down	mmu-mir-154	MI0000176	Mus musculus	22	UAGGUUAUCCGUGUUGCCUUCG	12	http://www.mirbase.org/cgi-bin/mirna_entry.pl?acc=MI0000176	---	Mus musculus miR-154 stem-loop	mir-154	MIPF0000018	2105.74	1293.57	0.279272	-0.432823
mmu-miR-192_st	-1.64113	-0.714688	1.64113	down	mmu-mir-192	MI0000551	Mus musculus	21	CUGACCUAUGAAUUGACAGCC	19	http://www.mirbase.org/cgi-bin/mirna_entry.pl?acc=MI0000551	---	Mus musculus miR-192 stem-loop	mir-192	MIPF0000063	274.102	167.135	0.340574	-0.374115
mmu-miR-7a_st	-1.64549	-0.71852	1.64549	down	mmu-mir-7a-1 /// mmu-mir-7a-2	MI0000728 /// MI0000729	Mus musculus	23	UGGAAGACUAGUGAUUUUGUUGU	13 /// 7	http://www.mirbase.org/cgi-bin/mirna_entry.pl?acc=MI0000728 /// http://www.mirbase.org/cgi-bin/mirna_entry.pl?acc=MI0000729	miR-7a (previously named miR-7) was predicted by computational methods using conservation between mouse, human and Fugu rubripes sequences [1]. Expression of the excised miR has been validated in zebrafish, and later independently verified in mouse [2]. The mature sequence shown here represents the most commonly cloned form from large-scale cloning studies [4]. The ends of the miRNA may be offset…	Mus musculus miR-7a-1 stem-loop /// Mus musculus miR-7a-2 stem-loop	mir-7 /// mir-7	MIPF0000022 /// MIPF0000022	325.3	196.859	0.388044	-0.330476
mmu-miR-19b_st	-1.6516	-0.723866	1.6516	down	mmu-mir-19b-1 /// mmu-mir-19b-2	MI0000718 /// MI0000546	Mus musculus	23	UGUGCAAAUCCAUGCAAAACUGA	14 /// X	http://www.mirbase.org/cgi-bin/mirna_entry.pl?acc=MI0000718 /// http://www.mirbase.org/cgi-bin/mirna_entry.pl?acc=MI0000546	/// Mouse miR-19b was cloned from mouse tissues by independent groups [1,2]. There are two predicted hairpin precursors, with closely related human homologues [4]: mir-19b-1 (MIR:MI0000718) on chromosome 14, and mir-19b-2 (previously named mir-19b here, MIR:MI0000546) on mouse chromosome X.	Mus musculus miR-19b-1 stem-loop /// Mus musculus miR-19b-2 stem-loop	mir-19 /// mir-19	MIPF0000011 /// MIPF0000011	790.079	478.919	0.348773	-0.375093
mmu-miR-374_st	-1.66803	-0.738148	1.66803	down	mmu-mir-374	MI0004125	Mus musculus	22	AUAUAAUACAACCUGCUAAGUG	X	http://www.mirbase.org/cgi-bin/mirna_entry.pl?acc=MI0004125	---	Mus musculus mir-374 stem-loop	mir-374	MIPF0000288	8.2743	4.96052	0.369074	-0.369074
mmu-miR-467c_st	-1.68437	-0.752211	1.68437	down	mmu-mir-467c	MI0005512	Mus musculus	22	UAAGUGCGUGCAUGUAUAUGUG	2	http://www.mirbase.org/cgi-bin/mirna_entry.pl?acc=MI0005512	---	Mus musculus miR-467c stem-loop	mir-467	MIPF0000316	4.99509	3.00981	0.258032	-0.494179
mmu-miR-410_st	-1.69007	-0.757082	1.69007	down	mmu-mir-410	MI0001161	Mus musculus	21	AAUAUAACACAGAUGGCCUGU	12	http://www.mirbase.org/cgi-bin/mirna_entry.pl?acc=MI0001161	Seitz et al. predicted a cluster of 40 miRNAs in the imprinted human 14q32 domain, and confirmed the expression of a subset by Northern blot or primer extension in mouse [1]. The mature sequence shown here represents the most commonly cloned form from large-scale cloning studies [4].	Mus musculus miR-410 stem-loop	mir-154	MIPF0000018	476.764	281.98	0.398825	-0.358257
mmu-miR-21_st	-1.70452	-0.769363	1.70452	down	mmu-mir-21	MI0000569	Mus musculus	22	UAGCUUAUCAGACUGAUGUUGA	11	http://www.mirbase.org/cgi-bin/mirna_entry.pl?acc=MI0000569	---	Mus musculus miR-21 stem-loop	mir-21	MIPF0000060	115.707	68.0703	0.348411	-0.420952
mmu-miR-338-3p_st	-1.70602	-0.770638	1.70602	down	mmu-mir-338	MI0000619	Mus musculus	22	UCCAGCAUCAGUGAUUUUGUUG	11	http://www.mirbase.org/cgi-bin/mirna_entry.pl?acc=MI0000619	---	Mus musculus miR-338 stem-loop	mir-338	MIPF0000097	72.7153	42.3354	0.435498	-0.33514
mmu-miR-329_st	-1.71102	-0.77486	1.71102	down	mmu-mir-329	MI0000605	Mus musculus	22	AACACACCCAGCUAACCUUUUU	12	http://www.mirbase.org/cgi-bin/mirna_entry.pl?acc=MI0000605	Kim et al. cloned 40 new miRNAs from rat E18 primary cortical neurons [1]. This mouse miRNA is predicted based on homology to the verified rat sequence (MIR:MI0000604). Seitz et al. independently predicted the miRNA hairpin precursor sequence by conservation between mouse and human [2]. Landgraf et al. verified expression by cloining [3].	Mus musculus miR-329 stem-loop	mir-329	MIPF0000110	1170.18	684.003	0.381195	-0.393666
mmu-miR-204_st	-1.75412	-0.810745	1.75412	down	mmu-mir-204	MI0000247	Mus musculus	22	UUCCCUUUGUCAUCCUAUGCCU	19	http://www.mirbase.org/cgi-bin/mirna_entry.pl?acc=MI0000247	The mature sequence shown here represents the most commonly cloned form from large-scale cloning studies [3].	Mus musculus miR-204 stem-loop	mir-204	MIPF0000042	236.139	134.455	0.430122	-0.380623
mmu-miR-15a_st	-1.76302	-0.818047	1.76302	down	mmu-mir-15a	MI0000564	Mus musculus	22	UAGCAGCACAUAAUGGUUUGUG	14	http://www.mirbase.org/cgi-bin/mirna_entry.pl?acc=MI0000564	---	Mus musculus miR-15a stem-loop	mir-15	MIPF0000006	876.05	497.244	0.400244	-0.417803
mmu-let-7i_st	-1.7733	-0.826433	1.7733	down	mmu-let-7i	MI0000138	Mus musculus	22	UGAGGUAGUAGUUUGUGCUGUU	10	http://www.mirbase.org/cgi-bin/mirna_entry.pl?acc=MI0000138	The mature sequence shown here represents the most commonly cloned form from large-scale cloning studies [4].	Mus musculus let-7i stem-loop	let-7	MIPF0000002	10659	6165.68	0.262047	-0.564386
mmu-miR-148a_st	-1.77369	-0.826757	1.77369	down	mmu-mir-148a	MI0000550	Mus musculus	22	UCAGUGCACUACAGAACUUUGU	6	http://www.mirbase.org/cgi-bin/mirna_entry.pl?acc=MI0000550	This sequence was previsouly named mir-148 here and in [1], but is renamed to avoid confusion with mir-148b (MIR:MI0000617). This sequence maps to mouse chromosome 6.	Mus musculus miR-148a stem-loop	mir-148	MIPF0000056	156.594	88.2845	0.415699	-0.411058
mmu-miR-199b_st	-1.7915	-0.841171	1.7915	down	mmu-mir-199b	MI0000714	Mus musculus	22	ACAGUAGUCUGCACAUUGGUUA	2	http://www.mirbase.org/cgi-bin/mirna_entry.pl?acc=MI0000714	Mouse miR-199b is predicted based on homology with the previously identified human miR-199b (MIR:MI0000282) [1,2]. Landgraf et al. later showed that the 3' product is the predominant one [3].	Mus musculus miR-199b stem-loop	mir-199	MIPF0000040	128.393	73.3499	0.308503	-0.532668
mmu-miR-376b_st	-1.81003	-0.856015	1.81003	down	mmu-mir-376b	MI0001162	Mus musculus	21	AUCAUAGAGGAACAUCCACUU	12	http://www.mirbase.org/cgi-bin/mirna_entry.pl?acc=MI0001162	Seitz et al. predicted a cluster of 40 miRNAs in the imprinted human 14q32 domain, and confirmed the expression of a subset by Northern blot or primer extension in mouse [1]. The mature miR-376b products have been shown to be modified by A to I edits [3]. The mature sequence shown here represents the most commonly cloned form from large-scale cloning studies [4].	Mus musculus miR-376b stem-loop	mir-368	MIPF0000091	1007.77	557.636	0.387982	-0.468033
mmu-miR-204_st	-1.75412	-0.810745	1.75412	down	mmu-mir-204	MI0000247	Mus musculus	22	UUCCCUUUGUCAUCCUAUGCCU	19	http://www.mirbase.org/cgi-bin/mirna_entry.pl?acc=MI0000247	The mature sequence shown here represents the most commonly cloned form from large-scale cloning studies [3].	Mus musculus miR-204 stem-loop	mir-204	MIPF0000042	236.139	134.455	0.430122	-0.380623
mmu-miR-15a_st	-1.76302	-0.818047	1.76302	down	mmu-mir-15a	MI0000564	Mus musculus	22	UAGCAGCACAUAAUGGUUUGUG	14	http://www.mirbase.org/cgi-bin/mirna_entry.pl?acc=MI0000564	---	Mus musculus miR-15a stem-loop	mir-15	MIPF0000006	876.05	497.244	0.400244	-0.417803
mmu-let-7i_st	-1.7733	-0.826433	1.7733	down	mmu-let-7i	MI0000138	Mus musculus	22	UGAGGUAGUAGUUUGUGCUGUU	10	http://www.mirbase.org/cgi-bin/mirna_entry.pl?acc=MI0000138	The mature sequence shown here represents the most commonly cloned form from large-scale cloning studies [4].	Mus musculus let-7i stem-loop	let-7	MIPF0000002	10659	6165.68	0.262047	-0.564386
mmu-miR-148a_st	-1.77369	-0.826757	1.77369	down	mmu-mir-148a	MI0000550	Mus musculus	22	UCAGUGCACUACAGAACUUUGU	6	http://www.mirbase.org/cgi-bin/mirna_entry.pl?acc=MI0000550	This sequence was previsouly named mir-148 here and in [1], but is renamed to avoid confusion with mir-148b (MIR:MI0000617). This sequence maps to mouse chromosome 6.	Mus musculus miR-148a stem-loop	mir-148	MIPF0000056	156.594	88.2845	0.415699	-0.411058
mmu-miR-199b_st	-1.7915	-0.841171	1.7915	down	mmu-mir-199b	MI0000714	Mus musculus	22	ACAGUAGUCUGCACAUUGGUUA	2	http://www.mirbase.org/cgi-bin/mirna_entry.pl?acc=MI0000714	Mouse miR-199b is predicted based on homology with the previously identified human miR-199b (MIR:MI0000282) [1,2]. Landgraf et al. later showed that the 3' product is the predominant one [3].	Mus musculus miR-199b stem-loop	mir-199	MIPF0000040	128.393	73.3499	0.308503	-0.532668
mmu-miR-376b_st	-1.81003	-0.856015	1.81003	down	mmu-mir-376b	MI0001162	Mus musculus	21	AUCAUAGAGGAACAUCCACUU	12	http://www.mirbase.org/cgi-bin/mirna_entry.pl?acc=MI0001162	Seitz et al. predicted a cluster of 40 miRNAs in the imprinted human 14q32 domain, and confirmed the expression of a subset by Northern blot or primer extension in mouse [1]. The mature miR-376b products have been shown to be modified by A to I edits [3]. The mature sequence shown here represents the most commonly cloned form from large-scale cloning studies [4].	Mus musculus miR-376b stem-loop	mir-368	MIPF0000091	1007.77	557.636	0.387982	-0.468033
mmu-miR-376c_st	-1.8223	-0.865763	1.8223	down	mmu-mir-376c	MI0003533	Mus musculus	21	AACAUAGAGGAAAUUUCACGU	12	http://www.mirbase.org/cgi-bin/mirna_entry.pl?acc=MI0003533	The mature miR-376c products have been shown to be modified by A to I edits [2].	Mus musculus miR-376c stem-loop	mir-368	MIPF0000091	7.69924	4.24817	0.357384	-0.508378
mmu-miR-15b_st	-1.8555	-0.891808	1.8555	down	mmu-mir-15b	MI0000140	Mus musculus	22	UAGCAGCACAUCAUGGUUUACA	3	http://www.mirbase.org/cgi-bin/mirna_entry.pl?acc=MI0000140	---	Mus musculus miR-15b stem-loop	mir-15	MIPF0000006	532.207	286.895	0.431499	-0.460309
mmu-miR-495_st	-1.85977	-0.895121	1.85977	down	mmu-mir-495	MI0004639	Mus musculus	22	AAACAAACAUGGUGCACUUCUU	12	http://www.mirbase.org/cgi-bin/mirna_entry.pl?acc=MI0004639	---	Mus musculus miR-495 stem-loop	mir-329	MIPF0000110	883.33	474.699	0.453229	-0.441892
mmu-miR-146b_st	-1.8824	-0.912574	1.8824	down	mmu-mir-146b	MI0004665	Mus musculus	22	UGAGAACUGAAUUCCAUAGGCU	19	http://www.mirbase.org/cgi-bin/mirna_entry.pl?acc=MI0004665	---	Mus musculus miR-146b stem-loop	mir-146	MIPF0000103	581.766	311.784	0.380836	-0.531738
mmu-miR-350_st	-1.91359	-0.936279	1.91359	down	mmu-mir-350	MI0000640	Mus musculus	22	UUCACAAAGCCCAUACACUUUC	1	http://www.mirbase.org/cgi-bin/mirna_entry.pl?acc=MI0000640	Kim et al. cloned 40 new miRNAs from rat E18 primary cortical neurons [1]. This mouse miRNA is predicted based on homology to the verified rat sequence (MIR:MI0000639) - its expression was later independently verified in mouse [2]. The sequence reported in [1] contains a 5' terminal A residue, which conflicts with the precursor sequence shown here. The mature sequence shown here represents the mo…	Mus musculus miR-350 stem-loop	mir-350	MIPF0000245	128.132	66.5426	0.531128	-0.405151
mmu-miR-380-3p_st	-1.91811	-0.939683	1.91811	down	mmu-mir-380	MI0000797	Mus musculus	22	UAUGUAGUAUGGUCCACAUCUU	12	http://www.mirbase.org/cgi-bin/mirna_entry.pl?acc=MI0000797	Seitz et al. predicted a cluster of 40 miRNAs in the imprinted human 14q32 domain, and confirmed the expression of a subset by Northern blot or primer extension in mouse, including a sequence from the 3' arm of this precursor [1]. Poy et al. cloned a sequence from the 5' arm from mouse pancreatic beta cell line MIN6 [2]. The mature sequence shown here represents the most commonly cloned form from…	Mus musculus miR-380 stem-loop	mir-379	MIPF0000126	117.129	61.0939	0.46311	-0.476573
mmu-miR-467b_st	-1.93361	-0.951297	1.93361	down	mmu-mir-467b	MI0004671	Mus musculus	21	GUAAGUGCCUGCAUGUAUAUG	2	http://www.mirbase.org/cgi-bin/mirna_entry.pl?acc=MI0004671	The sequence of miR-467 is of low complexity. The sequence maps exactly to several genomic positions, and many more with 1 or 2 substitutions. Confidence in this miRNA might therefore be reduced.	Mus musculus miR-467b stem-loop	mir-467	MIPF0000316	5.35843	2.78717	0.44189	-0.509407
mmu-miR-592_st	-1.9604	-0.971148	1.9604	down	mmu-mir-592	MI0004127	Mus musculus	23	AUUGUGUCAAUAUGCGAUGAUGU	6	http://www.mirbase.org/cgi-bin/mirna_entry.pl?acc=MI0004127	---	Mus musculus mir-592 stem-loop	mir-592	MIPF0000340	225.868	117.581	0.385935	-0.585213
mmu-miR-146a_st	-1.96391	-0.97373	1.96391	down	mmu-mir-146a	MI0000170	Mus musculus	22	UGAGAACUGAAUUCCAUGGGUU	11	http://www.mirbase.org/cgi-bin/mirna_entry.pl?acc=MI0000170	---	Mus musculus miR-146a stem-loop	mir-146	MIPF0000103	420.911	214.824	0.445199	-0.528531
mmu-miR-369-5p_st	-1.97213	-0.979756	1.97213	down	mmu-mir-369	MI0003535	Mus musculus	22	AGAUCGACCGUGUUAUAUUCGC	12	http://www.mirbase.org/cgi-bin/mirna_entry.pl?acc=MI0003535	The mature sequence shown here represents the most commonly cloned form from large-scale cloning studies [2].	Mus musculus miR-369 stem-loop	mir-154	MIPF0000018	600.593	305.103	0.455891	-0.523865
mmu-miR-335-5p_st	-1.97469	-0.981626	1.97469	down	mmu-mir-335	MI0000817	Mus musculus	23	UCAAGAGCAAUAACGAAAAAUGU	6	http://www.mirbase.org/cgi-bin/mirna_entry.pl?acc=MI0000817	---	Mus musculus miR-335 stem-loop	mir-335	MIPF0000196	293.466	148.616	0.490537	-0.491089
mmu-miR-133b_st	-2.00822	-1.00592	2.00822	down	mmu-mir-133b	MI0000821	Mus musculus	22	UUUGGUCCCCUUCAACCAGCUA	1	http://www.mirbase.org/cgi-bin/mirna_entry.pl?acc=MI0000821	miR-133b was predicted based on comparative analysis of human, mouse and Fugu [1]. It is homologous to miR-133a (MIR:MI0000159 and MIR:MI0000820). The mature sequence shown here represents the most commonly cloned form from large-scale cloning studies [3]. The 5' end of the miRNA may be offset with respect to previous annotations.	Mus musculus miR-133b stem-loop	mir-133	MIPF0000029	32.069	16.0527	0.464593	-0.541323
mmu-miR-199a-3p_st	-2.01324	-1.00952	2.01324	down	mmu-mir-199a-1 /// mmu-mir-199a-2	MI0000241 /// MI0000713	Mus musculus	22	ACAGUAGUCUGCACAUUGGUUA	9 /// 1	http://www.mirbase.org/cgi-bin/mirna_entry.pl?acc=MI0000241 /// http://www.mirbase.org/cgi-bin/mirna_entry.pl?acc=MI0000713	The hairpin precursor sequence mir-199 maps to two loci within 50 kb on mouse chromosome 9. This sequence was named mir-199 in [1] and [2], but is renamed here to avoid overlap with the predicted homologues of human mir-199a-2 and mir-199b. Landgraf et al. demonstrate comparable expression for products from both arms of the hairpin, which are therefore renamed miR-199a-5p and miR-199a-3p here [4]…	Mus musculus miR-199a-1 stem-loop /// Mus musculus miR-199a-2 stem-loop	mir-199 /// mir-199	MIPF0000040 /// MIPF0000040	120.216	59.7289	0.50011	-0.509407
mmu-miR-1983_st	-2.1126	-1.07902	2.1126	down	mmu-mir-1983	MI0009990	Mus musculus	21	CUCACCUGGAGCAUGUUUUCU	13	http://www.mirbase.org/cgi-bin/mirna_entry.pl?acc=MI0009990	Babiarz et al. show that mir-1983 is derived from Dicer-dependent processing of an alternative hairpin conformation of a tRNA(Ile) sequence [1]. The biological significance of the mature miRNA is unknown, and tRNA-derived miRNA sequences are not expected to be prevalent.	Mus musculus miR-1983 stem-loop	---	---	206.619	98.6202	0.467985	-0.611032
mmu-miR-148b_st	-2.12122	-1.08489	2.12122	down	mmu-mir-148b	MI0000617	Mus musculus	22	UCAGUGCAUCACAGAACUUUGU	15	http://www.mirbase.org/cgi-bin/mirna_entry.pl?acc=MI0000617	---	Mus musculus miR-148b stem-loop	mir-148	MIPF0000056	210.648	99.1389	0.566047	-0.518845
mmu-miR-203_st	-2.20051	-1.13783	2.20051	down	mmu-mir-203	MI0000246	Mus musculus	22	GUGAAAUGUUUAGGACCACUAG	12	http://www.mirbase.org/cgi-bin/mirna_entry.pl?acc=MI0000246	The mature sequence shown here represents the most commonly cloned form from large-scale cloning studies [2]. The 5' end of the miRNA may be offset with respect to previous annotations.	Mus musculus miR-203 stem-loop	mir-203	MIPF0000108	119.191	54.5894	0.496601	-0.641234
mmu-miR-708_st	-2.20051	-1.15762	2.20052	down	mmu-miR-708	MI0004692	Mus musculus	23	AAGGAGCUUACAAUCUAGCUGGG	7	http://www.mirbase.org/cgi-bin/mirna_entry.pl?acc=MI0004692	---	Mus musculus miR-708 stem-loop	mir-708	MIPF0000397	37.7485	17.2485	0.541709	-0.615906
mmu-miR-362-3p_st	-2.29103	-1.196	2.29103	down	mmu-mir-362	MI0000763	Mus musculus	22	AACACACCUGUUCAAGGAUUCA	X	http://www.mirbase.org/cgi-bin/mirna_entry.pl?acc=MI0000763	The mature sequence shown here represents the most commonly cloned form from large-scale cloning studies [3].	Mus musculus miR-362 stem-loop	mir-362	MIPF0000209	45.7661	19.957	0.604098	-0.591902
mmu-miR-669b_st	-2.52313	-1.33521	2.52313	down	mmu-mir-669b	MI0004666	Mus musculus	22	AGUUUUGUGUGCAUGUGCAUGU	2	http://www.mirbase.org/cgi-bin/mirna_entry.pl?acc=MI0004666	---	Mus musculus miR-669b stem-loop	mir-467	MIPF0000316	10.4907	4.1634	0.660778	-0.674436
mmu-miR-377_st	-2.57093	-1.36229	2.57093	down	mmu-mir-377	MI0000794	Mus musculus	22	AUCACACAAAGGCAACUUUUGU	12	http://www.mirbase.org/cgi-bin/mirna_entry.pl?acc=MI0000794	---	Mus musculus miR-377 stem-loop	mir-154	MIPF0000018	34.7355	14.2483	0.563332	-0.798959
mmu-miR-7b_st	-2.62271	-1.39106	2.62271	down	mmu-mir-7b	MI0000730	Mus musculus	23	UGGAAGACUUGUGAUUUUGUUGU	17	http://www.mirbase.org/cgi-bin/mirna_entry.pl?acc=MI0000730	miR-7 was predicted by computational methods using conservation between mouse, human and Fugu rubripes sequences [1]. Expression of the excised miR has been validated in zebrafish, and the 5' end mapped by PCR. This sequence represents the mouse homologue of human mir-7-3 -- the derived mature form differs at a single position from that expressed from mir-7-1 (MIR:MI0000728) and mir-7-2 (MIR:MI00…	Mus musculus miR-7b stem-loop	mir-7	MIPF0000022	45.5278	17.3489	0.710371	-0.680688
mmu-miR-466b-3p_st	-2.67672	-1.42047	2.67672	down	mmu-mir-466b-1 /// mmu-mir-466b-2 /// mmu-mir-466b-3 /// mmu-mir-466b-4 /// mmu-mir-466b-5 /// mmu-mir-466b-6 /// mmu-mir-466b-7 /// mmu-mir-466b-8	MI0005502 /// MI0005503 /// MI0005504 /// MI0014060 /// MI0014063 /// MI0014067 /// MI0014070 /// MI0014112	Mus musculus	22	AUACAUACACGCACACAUAAGA	2 /// 2 /// 2 /// 2 /// 2 /// 2 /// 2 /// 2	http://www.mirbase.org/cgi-bin/mirna_entry.pl?acc=MI0005502 /// http://www.mirbase.org/cgi-bin/mirna_entry.pl?acc=MI0005503 /// http://www.mirbase.org/cgi-bin/mirna_entry.pl?acc=MI0005504 /// http://www.mirbase.org/cgi-bin/mirna_entry.pl?acc=MI0014060 /// http://www.mirbase.org/cgi-bin/mirna_entry.pl?acc=MI0014063 /// http://www.mirbase.org/cgi-bin/mirna_entry.pl?acc=MI0014067 /// http://www.mirb…	/// /// /// /// /// /// ///	Mus musculus miR-466b-1 stem-loop /// Mus musculus miR-466b-2 stem-loop /// Mus musculus miR-466b-3 stem-loop /// Mus musculus miR-466b-4 stem-loop /// Mus musculus miR-466b-5 stem-loop /// Mus musculus miR-466b-6 stem-loop /// Mus musculus miR-466b-7 stem-loop /// Mus musculus miR-466b-8 stem-loop	mir-466 /// mir-466 /// mir-466 /// mir-466 /// mir-466 /// mir-466 /// mir-466 /// mir-466	MIPF0000208 /// MIPF0000208 /// MIPF0000208 /// MIPF0000208 /// MIPF0000208 /// MIPF0000208 /// MIPF0000208 /// MIPF0000208	25.2967	9.41613	0.738627	-0.681841
mmu-miR-539-5p_st	-2.69229	-1.42883	2.69229	down	mmu-mir-539	MI0003520	Mus musculus	22	GGAGAAAUUAUCCUUGGUGUGU	12	http://www.mirbase.org/cgi-bin/mirna_entry.pl?acc=MI0003520	---	Mus musculus miR-539 stem-loop	mir-154	MIPF0000018	96.4475	36.3843	0.600624	-0.82821

## Sheet: Sheet1
[Control](raw)	[Test](raw)	Mirbase ID
12.9987	52.0862	mmu-mir-486
5.72007	18.6373	mmu-mir-344f
33.0158	108.351	mmu-mir-490
10.6613	33.2384	mmu-mir-3097
20.0553	55.2972	mmu-mir-3107
28.8699	78.635	mmu-mir-706
29.4026	79.5153	mmu-mir-92b
9.99336	27.6664	mmu-mir-25
127.098	353.383	mmu-mir-204
478.614	1258.82	mmu-mir-3099
28.0233	71.6316	mmu-mir-193b
2.26868	6.26625	mmu-mir-3096b
1.76807	4.44856	mmu-mir-466k
35.8377	91.7553	mmu-mir-214
67.9477	166.668	mmu-mir-423
1315.72	3093.76	mmu-mir-320
22.7609	56.0721	mmu-mir-331
443.518	1082.55	mmu-mir-665
88.429	208.98	mmu-mir-323
4.73953	11.3526	mmu-mir-3061
417.676	947.236	mmu-mir-370
220.957	497.556	mmu-mir-700
156.592	346.924	mmu-mir-760
445.018	998.422	mmu-mir-770
27.6536	60.1768	mmu-let-7g
1486.77	3348.34	mmu-mir-140
257.756	577.128	mmu-mir-210
64.5772	147.259	mmu-mir-666
87.122	190.38	mmu-mir-490
370.516	809.236	mmu-mir-668
18.3173	38.429	mmu-mir-673
490.244	1035.2	mmu-mir-465c-1
416.56	859.387	mmu-mir-465c-2
467.443	1009.44	mmu-mir-500
100.152	210.291	mmu-mir-664
74.2486	154.749	mmu-mir-341
181.357	391.856	mmu-mir-99b
210.151	436.751	mmu-mir-540
7.95591	16.0567	mmu-mir-3096
552.546	1140.41	mmu-mir-139
154.69	324.748	mmu-mir-181c
143.966	291.329	mmu-mir-134
363.141	735.442	mmu-mir-7a-2
350.191	712.045	mmu-mir-874
243.541	497.441	mmu-mir-667
42.8982	86.8532	mmu-mir-877
277.835	552.082	mmu-mir-574
113.446	220.988	mmu-mir-187
430.594	850.968	mmu-mir-3107
124.41	247.996	mmu-mir-17
298.236	581.753	mmu-mir-298
610.273	1193.73	mmu-mir-92b
485.61	948.077	mmu-mir-134
148.506	287.885	mmu-mir-125a
45.8261	90.042	mmu-mir-135a-1
1010.19	2015.04	mmu-mir-346
34.9976	66.3149	mmu-mir-592
366.795	703.375	mmu-mir-491
754.635	1435.46	mmu-mir-532
94.7686	179.514	mmu-mir-184
9.49378	18.2536	mmu-mir-351
6.74479	12.378	mmu-mir-669d-2
1550.31	2924.91	mmu-mir-330
177.28	331.659	mmu-mir-339
426.248	808.835	mmu-mir-486
87.4045	160.218	mmu-mir-501
169.956	315.701	mmu-mir-505
3.17452	5.78135	mmu-mir-1903
195.583	357.486	mmu-mir-873
874.635	1609.21	mmu-mir-770
467.679	844.659	mmu-mir-1981
74.7284	132.807	mmu-mir-1187
852.81	1536.65	mmu-mir-485
2794.22	4958.39	mmu-mir-433
1.44548	2.57507	mmu-mir-3091
244.576	431.762	mmu-mir-106b
2.65219	4.59254	mmu-mir-5135
43.0677	76.6433	mmu-mir-383
215.179	380.122	mmu-mir-351
1.94702	3.45964	mmu-mir-5133
1.8508	3.18105	mmu-mir-294
65.8478	114.062	mmu-mir-218-2
1.57943	2.75668	mmu-let-7f-2
271.411	472.209	mmu-mir-137
31.8935	55.4526	mmu-mir-344d-3
53.4364	92.6715	mmu-mir-134
45.2982	78.8041	mmu-mir-874
159.662	272.911	mmu-mir-423
1.17259	2.00536	mmu-mir-465b-2
209.282	357.732	mmu-mir-125b-1
4769.29	8206.23	mmu-mir-99b
6.4229	10.678	mmu-mir-5126
678.453	1136.59	mmu-mir-672
277.861	471.388	mmu-mir-431
180.082	305.552	mmu-mir-666
305.274	505.954	mmu-mir-455
427.654	707.284	mmu-mir-1196
1645.17	2738.87	mmu-mir-93
201.645	335.57	mmu-mir-130b
93.5993	154.479	mmu-mir-296
2.71514	4.40663	mmu-mir-1962
1.99017	3.23802	mmu-mir-341
37.9296	62.6471	mmu-mir-193
5.73926	9.28796	mmu-mir-351
92.986	152.529	mmu-mir-135a-2
1.71703	2.81486	mmu-mir-678
7.10474	11.3578	mmu-mir-668
534.559	856.491	mmu-mir-342
401.425	638.016	mmu-mir-431
118.08	186.232	mmu-mir-677
1662.77	2668.84	mmu-mir-193b
1.84	2.89026	mmu-mir-1a-2
3480.07	5460.28	mmu-mir-149
35.6597	55.645	mmu-mir-181a-2
1895.27	2946.79	mmu-mir-344-1 /// mmu-mir-344-2
3728.52	5809.41	mmu-mir-674
2.49107	3.85273	mmu-mir-3966
70.3777	109.958	mmu-mir-671
2.00979	3.12036	mmu-mir-181a-1
3843.69	5926.34	mmu-mir-383
2.80013	4.26501	mmu-mir-1932
6402.31	9762	mmu-mir-342
2240.68	3429.45	mmu-mir-652
2.52599	3.85471	mmu-mir-3076
7.00136	10.6026	mmu-mir-714
207.095	138.007	mmu-mir-669c
18788.4	12491.9	mmu-let-7a-1 /// mmu-let-7a-2
826.177	551.208	mmu-mir-153
2.67682	1.74281	mmu-mir-101b
2.4314	1.58218	mmu-mir-1931
3547.61	2312.97	mmu-mir-30b
37.7598	24.7026	mmu-mir-466c-1 /// mmu-mir-466c-2
73.6927	47.5794	mmu-mir-669p-1 /// mmu-mir-669p-2
393.996	254.479	mmu-mir-106a
11.1577	7.20602	mmu-mir-2183
18.5709	11.9184	mmu-mir-297a-1 /// mmu-mir-297a-2 /// mmu-mir-297a-3 /// mmu-mir-297a-4 /// mmu-mir-297a-5 /// mmu-mir-297a-6
4.11722	2.65916	mmu-mir-16-1
2.50188	1.60221	mmu-mir-194-1
4553.19	2929.97	mmu-mir-27b
30.0424	18.8061	mmu-mir-1894
2.6625	1.70054	mmu-mir-1960
599.759	383.264	mmu-mir-137
745.06	473.373	mmu-mir-338
2.70621	1.697	mmu-mir-449a
1173.7	743.262	mmu-mir-29b-1 /// mmu-mir-29b-2
136.782	86.3283	mmu-mir-598
201.826	128.053	mmu-mir-301a
385.399	242.292	mmu-mir-25
2.42201	1.49691	mmu-mir-5123
20.065	12.6924	mmu-mir-103-2
153.822	96.8553	mmu-mir-98
821.26	505.26	mmu-mir-9-1 /// mmu-mir-9-2 /// mmu-mir-9-3
2.41991	1.51966	mmu-mir-3080
3.30648	2.03492	mmu-mir-701
3.27198	2.00061	mmu-mir-224
2105.74	1293.57	mmu-mir-154
133.66	81.7917	mmu-mir-1839
274.102	167.135	mmu-mir-192
325.3	196.859	mmu-mir-7a-1 /// mmu-mir-7a-2
790.079	478.919	mmu-mir-19b-1 /// mmu-mir-19b-2
8.2743	4.96052	mmu-mir-374
4.99509	3.00981	mmu-mir-467c
476.764	281.98	mmu-mir-410
115.707	68.0703	mmu-mir-21
72.7153	42.3354	mmu-mir-338
31.0344	18.1808	mmu-mir-361
1170.18	684.003	mmu-mir-329
54.7473	31.6644	mmu-mir-3473
151.599	88.2494	mmu-mir-7a-1
125.53	72.864	mmu-mir-29c
236.139	134.455	mmu-mir-204
3.76691	2.13712	mmu-mir-130b
876.05	497.244	mmu-mir-15a
10659	6165.68	mmu-let-7i
156.594	88.2845	mmu-mir-148a
4.91226	2.65724	mmu-mir-1934
128.393	73.3499	mmu-mir-199b
1007.77	557.636	mmu-mir-376b
7.69924	4.24817	mmu-mir-376c
676.331	370.367	mmu-mir-132
559.914	306.558	mmu-mir-218-1 /// mmu-mir-218-2
6.77719	3.62461	mmu-mir-382
519.658	282.589	mmu-mir-411
532.207	286.895	mmu-mir-15b
883.33	474.699	mmu-mir-495
21.8188	11.8028	mmu-mir-1981
186.572	100.476	mmu-mir-872
581.766	311.784	mmu-mir-146b
128.132	66.5426	mmu-mir-350
117.129	61.0939	mmu-mir-380
5.35843	2.78717	mmu-mir-467b
111.302	57.9842	mmu-mir-433
225.868	117.581	mmu-mir-592
420.911	214.824	mmu-mir-146a
8.67914	4.37934	mmu-mir-466h
63.9907	32.6617	mmu-mir-669o
600.593	305.103	mmu-mir-369
293.466	148.616	mmu-mir-335
32.069	16.0527	mmu-mir-133b
120.216	59.7289	mmu-mir-199a-1 /// mmu-mir-199a-2
4.80765	2.33967	mmu-mir-297a-3 /// mmu-mir-297a-4
37.468	17.7046	mmu-mir-691
206.619	98.6202	mmu-mir-1983
2079.21	987.515	mmu-mir-9-1 /// mmu-mir-9-2 /// mmu-mir-9-3
210.648	99.1389	mmu-mir-148b
228.947	107.249	mmu-mir-154
136.835	63.5917	mmu-mir-22
22.1723	10.9296	mmu-mir-3970
81.0462	37.2274	mmu-mir-582
6810.19	3277.68	mmu-let-7g
270.349	127.324	mmu-mir-299
9.17153	4.3088	mmu-mir-350
301.607	138.921	mmu-mir-384
7.4467	3.33674	mmu-mir-669k
119.191	54.5894	mmu-mir-203
6.12398	2.73573	mmu-mir-33
6.40564	2.90715	mmu-mir-669l
4589.42	2035.53	mmu-let-7f-1 /// mmu-let-7f-2
45.7661	19.957	mmu-mir-362
10.7755	4.7221	mmu-mir-669c
24.5108	10.7983	mmu-mir-764
47.4616	20.3057	mmu-mir-28c
8.53222	3.93487	mmu-mir-5115
115.789	48.9783	mmu-mir-337
13.3503	5.5995	mmu-mir-3083
75.791	30.9753	mmu-mir-221
8.00915	3.20945	mmu-mir-466p
10.4907	4.1634	mmu-mir-669b
46.4092	18.3851	mmu-mir-300
34.7355	14.2483	mmu-mir-377
7.78067	2.97058	mmu-let-7a-2
45.5278	17.3489	mmu-mir-7b
209.976	83.1212	mmu-mir-30e
84.4911	32.0322	mmu-mir-379
15.6166	6.21494	mmu-mir-103-1
25.2967	9.41613	mmu-mir-466b-1 /// mmu-mir-466b-2 /// mmu-mir-466b-3 /// mmu-mir-466b-4 /// mmu-mir-466b-5 /// mmu-mir-466b-6 /// mmu-mir-466b-7 /// mmu-mir-466b-8
96.4475	36.3843	mmu-mir-539
9.72541	3.29402	mmu-mir-5135
87.0175	28.3632	mmu-mir-669a-1 /// mmu-mir-669a-10 /// mmu-mir-669a-11 /// mmu-mir-669a-12 /// mmu-mir-669a-2 /// mmu-mir-669a-4 /// mmu-mir-669a-5 /// mmu-mir-669a-6 /// mmu-mir-669a-7 /// mmu-mir-669a-8 /// mmu-mir-669a-9
38.5659	12.6898	mmu-mir-1907
18.673	5.96576	mmu-mir-1982
10.6209	3.57322	mmu-mir-466c-1 /// mmu-mir-466c-2
38.9008	12.8954	mmu-mir-34a
16.6014	5.54661	mmu-mir-466e
45.4407	13.4304	mmu-mir-501
45.3722	13.3696	mmu-mir-872
36.6055	11.5866	mmu-mir-1843
11.9518	2.89665	mmu-mir-181a-2
18.3677	4.1426	mmu-mir-466a
9.37891	2.14524	mmu-mir-1a-1 /// mmu-mir-1a-2
13.5603	3.04669	mmu-mir-191
